# Supplementary material
Source: PubMed Central journal article supplement (PMC9016170)
Supplement: 00479-2021.supplement.pdf [file 00479-2021.supplement.pdf]

## ONLINE SUPPLEMENTAL MATERIAL

**Title:** Respiratory symptoms and radiologic findings in post-acute COVID-19 syndrome

**Short title:** Respiratory symptoms in post-acute COVID-19 syndrome

**Author list:** Etienne-Marie Jutant, MD<sup>1,2,3</sup>, Olivier Meyrignac, MD, PhD<sup>1,4</sup>, Antoine Beurnier, MD<sup>1,2,5</sup>, Xavier Jaïs, MD<sup>1,2,3</sup>, Tai Pham, MD, PhD<sup>1,6</sup>, Luc Morin, MD<sup>1,7</sup>, Athénaïs Boucly, MD<sup>1,2,3</sup>, Sophie Bulifon, MD<sup>1,2,3</sup>, Samy Figueiredo, MD, PhD<sup>1,8</sup>, Anatole Harrois, MD, PhD<sup>1,8</sup>, Mitja Jevnikar, MD<sup>1,2,3</sup>, Nicolas Noël, MD, PhD<sup>1,9</sup>, Jérémie Pichon, MD<sup>1,2,3</sup>, Anne Roche, MD<sup>1,2,3</sup>, Andrei Seferian, MD<sup>1,2,3</sup>, Samer Soliman, MD<sup>1,4</sup>, Jacques Duranteau, MD, PhD<sup>1,8</sup>, Laurent Becquemont, MD, PhD<sup>1,10</sup>, Xavier Monnet, MD, PhD<sup>1,6</sup>, Olivier Sitbon, MD, PhD<sup>1,2,3</sup>, Marie-France Bellin, MD<sup>1,4</sup>, Marc Humbert, MD, PhD<sup>1,2,3</sup>, Laurent Savale, MD, PhD<sup>1,2,3\*</sup>, David Montani, MD, PhD<sup>1,2,3\*</sup> and the COMEBAC Study Group

LS and DM contributed equally

1. *Université Paris-Saclay, Faculty of Medicine, Le Kremlin-Bicêtre, France*
2. *INSERM UMR\_S 999, Hôpital Marie Lannelongue, Le Plessis Robinson, France*
3. *AP-HP, Department of Respiratory and Intensive Care Medicine, Pulmonary Hypertension National Referral Centre, Hôpital Bicêtre, DMU 5 Thorinno, Le Kremlin-Bicêtre, France*
4. *AP-HP, Service de radiologie diagnostique et interventionnelle, Hôpital de Bicêtre, DMU 14 Smart Imaging, BioMaps, Le Kremlin-Bicêtre, France*
5. *AP-HP, Department of Physiology – Pulmonary Function Testing, DMU 5 Thorinno, Hôpital Bicêtre, Le Kremlin-Bicêtre, France*
6. *AP-HP, Service de Médecine Intensive-Réanimation, Hôpital de Bicêtre, DMU 4 CORREVE Maladies du Cœur et des Vaisseaux, FHU Sepsis, Le Kremlin-Bicêtre, France*
7. *AP-HP, Service de Réanimation Pédiatrique et Médecine Néonatale, Hôpital de Bicêtre, DMU3 Santé de l'Enfant et de l'Adolescent, Le Kremlin-Bicêtre, France*
8. *AP-HP, Service d'anesthésie-réanimation et médecine péri-opératoire, Hôpital de Bicêtre, DMU 12 Anesthésie, réanimation, douleur, Le Kremlin-Bicêtre, France*
9. *AP-HP, Service de médecine interne et immunologie clinique, Hôpital de Bicêtre, DMU 7 Endocrinologie-immunités-inflammations-cancer-urgences, Le Kremlin-Bicêtre, France*
10. *AP-HP, Centre de recherche Clinique Paris-Saclay, DMU 13 Santé publique, Information médicale, Appui à la recherche clinique, INSERM U1018, CESP (Centre de Recherche en Epidémiologie et Santé des Populations)*

## Supplemental methods

### List of symptoms evaluated at telephone consultation

#### General signs

- Anorexia
- Fatigue
- New hospitalization
- Weight loss

#### Respiratory signs

- New-onset dyspnoea
- Chest discomfort, chest pain
- New-onset cough
- Abnormal lung CT-scan since discharge

#### Neurologic signs

- Headache
- Paresthesia
- Anosmia
- Limb palsy

#### Cognitive signs

- Memory losses
- Slowness for reasoning, activity planification or problem solving
- Concentration, attention difficulties

### Questionnaire administered during telephone consultation

#### Consent

*Date of the teleconsultation: [date]*

*Consultant name: [Consultant name]*

*Patient identity: [First name] [Last name], [Date of birth], [Calculated age] years*

*Was admitted in the following departments: [admission department]*

My name is [Consultant name] and I work at Bicêtre hospital. You were admitted in [admission department] for COVID-19 three months ago.

We call you today to organize your follow-up.

If you agree, I will ask you some questions that will be used to orientate your needs of medical follow-up specific to your COVID-19 infection.

May I continue this interview? [YES / NO]

If no, why? [text]

*Is-it the patient him/herself? [YES / NO]*

*If not, who is the respondent [First name] [Last name], [phone number] and relationship to the patient [Spouse, Children, Sibling, Neighbor/Friend, Care giver]*

*Has the patient died since discharge? [YES / NO]*

*If yes, where has the patient died? [Home, Rehabilitation facility, Retirement home, Other hospital inpatient, Other]*

*[date of death] and [cause of death]*

### **General inquiry**

Do you speak French? [YES / NO]

If not, what language do you speak? [Text]

If not, can someone of your household assist you for the teleconsultation? [YES / NO]

If not, can someone of your household assist you for the day hospital? [YES / NO]

Do you have an insurance? [YES / NO]

On the [date of discharge], you were discharged from Bicêtre hospital. Where did you go? [Home, Rehabilitation facility, Retirement home, Other hospital, Other].

When did you get home? [date]

Are you working at the moment? [YES / NO]

If yes, since when? [date]

What do you do? [Text]

Did you have a significant medical event since your discharge? [YES / NO]

If yes, what was it? [text] When was it? [date]

If yes, were you admitted in a hospital for this event? [YES / NO]

If yes, did you consult a physician? [YES / NO]

If yes, whom? [Text]

If yes, did you do any laboratory or radiologic examination? [YES / NO]

Did you modify your usual treatment since discharge? [YES / NO]

Where do you live now? [Home, Relative, Rehabilitation facility, Retirement home, Other]

Were you living there prior to your hospitalization for COVID19? [YES / NO]

If yes, where were you living prior to your hospitalization for COVID19? [Home, Relative, Rehabilitation facility, Retirement home, Other]

How much did you weigh before your admission? [text]

How much did you weigh when you were discharged? [Text]

How much do you currently weigh? [Text]

Do you have a new and persistent anorexia since your hospitalization? [YES / NO]

Do you have a new and persistent fatigue since your hospitalization? [YES / NO]

### **Respiratory symptoms**

*In his/her chart, is the patient known to have had a pulmonary embolism during his stay? [YES / NO]*

Do you feel abnormally breathless at rest or when active? [YES / NO]

If yes, did you feel the same prior to your hospitalization? [YES / NO]

Do you feel heaviness, pain or chest discomfort at rest or when active? [YES / NO]

If yes, did you feel the same prior to your hospitalization? [YES / NO]

Do you cough every day? [YES / NO]

If yes, was it the same prior to your hospitalization? [YES / NO]

Did you do a chest CT scan since your discharge as it may have been prescribed at your discharge? [YES / NO]

If yes, when [date]?

What was the result? [Normal/Abnormal]  
Do you have a CD with the images? [YES / NO]

### **Neurological symptoms**

*In his/her chart, is the patient known to have had an abnormal brain MRI during his stay?*  
[YES / NO]

*In his/her chart, is the patient known to have had an abnormal brain EEG during his stay?*  
[YES / NO]

Do you have a new and persistent anosmia since your hospitalization? [YES / NO]

Do you have new and persistent headaches since your hospitalization? [YES / NO]

If yes, on a scale from 1 to 10, 0 being no pain at all and 10 being the worst you could imagine, how much would you rate your headaches related pain? [1-10]

What medication do you take for your headaches? [Text]

Do you have new and persistent paresthesia since your hospitalization? [YES / NO]

Do you have new and persistent burn-like or electric-like pain since your hospitalization?  
[YES / NO]

Do you have new and persistent loss of function of one of your limbs since your hospitalization? [YES / NO]

### **Cognitive disorder screening (Q3PC)**

During the last 2 weeks, and significantly more than previously, do you:

- Have memory losses (for eg., Missed an appointment, forgotten a recent event, or misplaced a daily object)?

[Rarely: less than once a week; Sometimes: once a week; Often: Several times a week but not every day; Very often: Almost all the time]

- Feel like you were slower for reasoning, activity planification or problem solving?

[Rarely: less than once a week; Sometimes: once a week; Often: Several times a week but not every day; Very often: Almost all the time]

- Experience difficulties to concentrate or muster your attention (for eg., follow a conversation, read the paper or follow a tv program)?

[Rarely: less than once a week; Sometimes: once a week; Often: Several times a week but not every day; Very often: Almost all the time]

### **Elderly**

Regarding corporeal hygiene, do you have:

- [Total autonomy / Partial help / Dependent]

- Deterioration since the hospitalization for COVID19: [YES / NO]

Regarding dressing, do you have:

- [Total autonomy for clothes choice and dressing / Autonomy for clothes choice and dressing, but requires help for / Dependent]

- Deterioration since the hospitalization for COVID19: [YES / NO]

Regarding bathroom use, do you have:

- [Total autonomy for undressing and dressing / Requires help for undressing or dressing / Dependent]

- Deterioration since the hospitalization for COVID19: [YES / NO]

Regarding locomotion, do you have:

- [Total autonomy / Partial help / Bedridden]
- Deterioration since the hospitalization for COVID19: [YES / NO]

Regarding continence, do you have:

- [Continent / Occasional incontinence / Incontinent]
- Deterioration since the hospitalization for COVID19: [YES / NO]

Regarding meals, do you:

- [Eats alone/ Requires help for service, cutting the meat or peeling a fruit/ Dependent]
- Deterioration since the hospitalization for COVID19: [YES / NO]

*Does the patient have 3 or more deterioration in the score? [YES / NO]*

*Do you have any helping at home? [YES / NO]*

*Did you fell since your hospitalization? [YES / NO]*

*If yes, how many times? [Number]*

*If more than twice, are you under a physiotherapist care? [YES / NO]*

*Has the patient lost more than 5kg since discharge? [YES / NO]*

*Did the patient report an altered general state with association of asthenia, anorexia and weight loss? [YES / NO]*

### **Nephrology**

Do you have a known renal disease (e.g., renal transplant recipient, on hemodialysis or any renal chronic condition)? [YES / NO]

*In his/her chart, what is the patient's last known creatinine level and glomerular filtration rate before discharge? [Text]*

### **Ethics**

We would like to inform you that your personal data, recorded during this teleconsultation may be used for medical research under the responsibility of the *Assistance publique-hôpitaux de Paris*. You can refuse now, or any time by contacting us, your primary doctor at the hospital or the data protection officer at the hospital.

*Information was given and the patient did not express refusal: [YES / NO]*

**Table E1. Modified Medical Research Council (mMRC) dyspnoea scale**

| <b>Grade</b> | <b>Description of breathlessness</b>                                                                                                         |
|--------------|----------------------------------------------------------------------------------------------------------------------------------------------|
| 0            | I only get breathless with strenuous exercise                                                                                                |
| 1            | I get short of breath when hurrying on level ground or walking up a slight hill                                                              |
| 2            | On level ground, I walk slower than people of the same age because of breathlessness, or have to stop for breath when walking at my own pace |
| 3            | I stop for breath after walking about 100 yards or after a few minutes on level ground                                                       |
| 4            | I am too breathless to leave the house or I am breathless when dressing                                                                      |

**Table E2. Nijmegen questionnaire**

How often do you suffer from the symptoms listed? Please score each item from 0 to 4:  
0: never; 1: rarely; 2: sometimes; 3: often; 4: very often

| <b>SYMPTOMS</b>                               | <b>SCORE (from 0 to 4)</b> |
|-----------------------------------------------|----------------------------|
| Chest pain                                    |                            |
| Feeling tense                                 |                            |
| Blurred vision                                |                            |
| Dizzy spells                                  |                            |
| To be confused, losing touch with environment |                            |
| Accelerated or deepened breathing             |                            |
| Shortness of breath                           |                            |
| Constricted chest                             |                            |
| Bloated abdominal sensation                   |                            |
| Unable to breathe deeply                      |                            |
| Tingling around the mouth                     |                            |
| Cold hands or feet                            |                            |
| Palpitations                                  |                            |
| Anxiety                                       |                            |
| <b>Total score</b>                            | <b>/64</b>                 |

A score > 22 suggests respiratory functional complaints.

**Table E3. Multivariate analysis for the comparisons of patients with and without new-onset dyspnea.**

|                        | Estimate | 95% CI low | 95% CI high | Pr (> z ) |
|------------------------|----------|------------|-------------|-----------|
| Age                    | 0.98     | 0.96       | 1.00        | 0.082     |
| Chronic heart disease  | 0.27     | 0.04       | 1.01        | 0.098     |
| Chronic kidney disease | 0.17     | 0.01       | 0.86        | 0.093     |
| Hospitalization in ICU | 3.9      | 2.2        | 6.98        | <0.001    |
| Pulmonary embolism     | 2.48     | 1.12       | 5.35        | 0.022     |

CI : confidence interval ; ICU: intensive care unit ;



**Table E4. Multivariate analysis for the comparisons of patients with and without lung fibrotic lesions**

|                        | Estimate | 95% CI low | 95% CI high | Pr (> z ) |
|------------------------|----------|------------|-------------|-----------|
| Age                    | 1.04     | 0.99       | 1.09        | 0.114     |
| Hospitalization in ICU | 18.57    | 5.02       | 102.29      | <0.001    |
| Pulmonary embolism     | 6.56     | 2.26       | 21.02       | 0.001     |

CI : confidence interval ; ICU: intensive care unit ;

**Table E5. Baseline and hospitalization characteristics of the patients who had fibrotic lesions at the ambulatory care visit according to the presence of dyspnoea**

|                                          | <i>Available data</i> | <b>All patients<br/>(33)</b> | <b>Patients with fibrotic<br/>lesions and new-onset<br/>dyspnoea<br/>(18)</b> | <b>Patients with fibrotic lesions<br/>without new-onset<br/>dyspnoea<br/>(15)</b> | <b>P-value</b> |
|------------------------------------------|-----------------------|------------------------------|-------------------------------------------------------------------------------|-----------------------------------------------------------------------------------|----------------|
| <b>Demographic data</b>                  |                       |                              |                                                                               |                                                                                   |                |
| <b>Age, years</b>                        | 33                    | 61.2±10.9                    | 59.1±8.3                                                                      | 63.6±13.4                                                                         | 0.27           |
| <b>Women</b>                             | 33                    | 9 (27.3%)                    | 6 (33.3%)                                                                     | 3 (20.0%)                                                                         | 0.46           |
| <b>Body mass index, kg/m<sup>2</sup></b> | 31                    | 28.2±4.9                     | 26.6±4.2                                                                      | 29.8±5.2                                                                          | 0.07           |
| <b>Smoking</b>                           |                       |                              |                                                                               |                                                                                   |                |
| <b>No (&lt; 5 pack-years)</b>            | 31                    | 22 (71.0%)                   | 14 (82.4%)                                                                    | 8 (57.1%)                                                                         | 0.29           |
| <b>Former (≥ 5 pack-years)</b>           | 31                    | 5 (16.1%)                    | 2 (11.8%)                                                                     | 3 (21.4%)                                                                         |                |
| <b>Active</b>                            | 31                    | 4 (12.9%)                    | 1 (5.9%)                                                                      | 3 (21.4%)                                                                         |                |
| <b>Pre-COVID-19 Comorbidities</b>        |                       |                              |                                                                               |                                                                                   |                |
| <b>Respiratory disease</b>               |                       |                              |                                                                               |                                                                                   |                |
| - COPD                                   | 33                    | 1 (3.0%)                     | 0 (0%)                                                                        | 1 (6.7%)                                                                          | 0.46           |
| - Other than COPD                        | 33                    | 5 (15.2%)                    | 1 (5.6%)                                                                      | 4 (26.7%)                                                                         | 0.15           |
| <b>Hypertension</b>                      | 33                    | 12 (36.4%)                   | 6 (33.3%)                                                                     | 6 (40.0%)                                                                         | 0.97           |
| <b>Chronic heart disease</b>             | 33                    | 3 (9.1%)                     | 1 (5.6%)                                                                      | 2 (13.3%)                                                                         | 0.58           |
| <b>Diabetes</b>                          | 33                    | 7 (21.2%)                    | 4 (22.2%)                                                                     | 3 (20.0%)                                                                         | 1              |
| <b>Chronic kidney disease</b>            | 33                    | 1 (3.0%)                     | 0 (0%)                                                                        | 1 (6.7%)                                                                          | 0.46           |
| <b>Declared psychiatric disorder</b>     | 33                    | 5 (15.2%)                    | 3 (16.7%)                                                                     | 2 (13.3%)                                                                         | 1              |
| <b>Neurodegenerative disorder</b>        | 33                    | 2 (1.2%)                     | 0 (0%)                                                                        | 2 (1.5%)                                                                          | 1              |
| <b>Alcohol misuse</b>                    | 31                    | 1 (3.2%)                     | 1 (5.9%)                                                                      | 0 (0%)                                                                            | 1              |
| <b>Active cancer</b>                     | 33                    | 1 (3.0%)                     | 1 (5.6%)                                                                      | 0 (0%)                                                                            | 0.48           |
| <b>Other immunosuppression</b>           | 33                    | 1 (3.0%)                     | 1 (5.6%)                                                                      | 0 (0%)                                                                            | 1              |

|                                                   |    |            |            |            |      |
|---------------------------------------------------|----|------------|------------|------------|------|
| Long-term dialysis                                | 33 | 0 (0%)     | 0 (0%)     | 0 (0%)     | 1    |
| HIV infection                                     | 33 | 0 (0%)     | 0 (0%)     | 0 (0%)     | 1    |
| Solid organ transplantation                       | 33 | 0 (0%)     | 0 (0%)     | 0 (0%)     | 1    |
| Liver disease                                     | 33 | 0 (0%)     | 0 (0%)     | 0 (0%)     | 1    |
| Pregnancy                                         | 33 | 0 (0%)     | 0 (0%)     | 0 (0%)     | 1    |
| <b>Hospitalization characteristics</b>            |    |            |            |            |      |
| Total duration of hospitalization, days           | 33 | 34±25      | 36±29      | 33±19      | 0.78 |
| Hospitalization in ICU                            | 33 | 29 (87.9%) | 17 (94.4%) | 12 (80.0%) | 0.31 |
| Duration of ICU stay, days                        | 29 | 24±21      | 25±25      | 22±15      | 0.66 |
| High flow oxygen                                  | 33 | 18 (62.1%) | 12 (70.6%) | 6 (50.0%)  | 0.08 |
| Intubation during hospitalization                 | 33 | 18 (62.1%) | 12 (70.6%) | 6 (50.0%)  | 0.44 |
| Duration of intubation, days                      | 33 | 30±17      | 31±17      | 28±16      | 0.73 |
| Pulmonary embolism                                | 33 | 13 (44.8%) | 6 (37.5%)  | 7 (53.8%)  | 0.61 |
| Active anticoagulation (at full therapeutic dose) | 33 | 15 (45.5%) | 12 (66.7%) | 3 (20.0%)  | 0.02 |
| <b>Specific treatments during hospitalization</b> |    |            |            |            |      |
| Azithromycin                                      | 33 | 12 (36.4%) | 10 (55.6%) | 2 (13.3%)  | 0.03 |
| Tocilizumab (anti-IL-6)                           | 33 | 12 (36.4%) | 6 (33.3%)  | 6 (40.0%)  | 0.97 |
| Hydroxychloroquine                                | 33 | 5 (15.2%)  | 4 (22.2%)  | 1 (6.7%)   | 0.35 |
| Corticosteroids                                   | 33 | 3 (9.1%)   | 1 (5.6%)   | 2 (13.3%)  | 0.58 |
| Lopinavir/ritonavir                               | 33 | 2 (6.1%)   | 2 (11.1%)  | 0 (0%)     | 0.49 |
| Anakinra (anti-IL-1RA)                            | 33 | 3 (9.1%)   | 0 (0%)     | 3 (20%)    | 0.08 |
| Remdesivir                                        | 33 | 0 (0%)     | 0 (0%)     | 0 (0%)     | 1    |

Values are expressed as the mean±SD, or as number and frequency. The P-values refer to a comparison between patients with and without fibrotic lesions

COPD: chronic obstructive pulmonary disease; HIV: human immunodeficiency virus; ICU: intensive care unit

**Table E6. Characteristics of the patients with fibrotic lesions at the ambulatory care visit according to the presence of new-onset dyspnoea**

|                                                                | Available data | All patients (33) | Patients with fibrotic lesions with new-onset dyspnoea (18) | Patients with fibrotic lesions without new-onset dyspnoea (15) | P-value |
|----------------------------------------------------------------|----------------|-------------------|-------------------------------------------------------------|----------------------------------------------------------------|---------|
| <b>Time from hospital discharge to outpatient clinic, days</b> | 33             | 82±26             | 82±28                                                       | 82±26                                                          | 0.98    |
| <b>Assessment at ambulatory care visit</b>                     |                |                   |                                                             |                                                                |         |
| <b>mMRC scale score for dyspnoea</b>                           | 33             |                   |                                                             |                                                                | 0.006   |
| - 0                                                            |                | 15 (45.5%)        | 4 (22.2)                                                    | 11 (73.3)                                                      |         |
| - 1-2                                                          |                | 14 (42.4%)        | 12 (66.6)                                                   | 2 (13.3)                                                       |         |
| - 3-4                                                          |                | 4 (12.1%)         | 2 (11.1)                                                    | 2 (13.4)                                                       |         |
| <b>New-onset cough</b>                                         | 33             | 5 (15.6%)         | 4 (23.5%)                                                   | 1 (6.7%)                                                       | 0.34    |
| <b>6-Minute walk test, m</b>                                   | 33             | 451±107           | 457±74                                                      | 445±138                                                        | 0.78    |
| <b>Pulmonary functional tests</b>                              |                |                   |                                                             |                                                                |         |
| <b>FEV1, %pred</b>                                             | 31             | 86.2±20.0         | 79.3±14.4                                                   | 94.6±23.0                                                      | 0.04    |
| <b>FEV1/VC, %</b>                                              | 31             | 82.3±6.4          | 82.9±5.8                                                    | 81.5±7.2                                                       | 0.55    |
| <b>VC, %pred</b>                                               | 31             | 80.6±20.0         | 73.9±15.6                                                   | 88.7±22.2                                                      | 0.04    |
| <b>TLC, %pred</b>                                              | 31             | 74.1±13.7         | 68.6±12.0                                                   | 81.3±12.8                                                      | 0.01    |
| <b>DLCO, %pred</b>                                             | 29             | 73.3±17.9         | 71.2±21.1                                                   | 75.8±13.4                                                      | 0.48    |
| <b>DLCO &lt; 70%</b>                                           | 29             | 12 (41.4%)        | 8 (50.0%)                                                   | 4 (30.8%)                                                      | 0.51    |
| <b>Nijmegen score &gt; 22</b>                                  | 33             | 2 (6.3%)          | 2 (11.8%)                                                   | 0 (0%)                                                         | 0.49    |
| <b>LVEF ≤ 50% on echocardiography</b>                          | 26             | 5 (19.2%)         | 4 (25.0%)                                                   | 1 (10.0%)                                                      | 0.62    |

*Values are expressed as the mean±SD, or as number and frequency. The P-values refer to a comparison between patients with and without fibrotic lesions*
